# Supplementary material for: Prenatal nicotine exposure-induced intrauterine programming alteration increases the susceptibility of high-fat diet-induced non-alcoholic simple fatty liver in female adult offspring rats
Source: Royal Society of Chemistry journal article supplement (doi:10.1039/c4tx00092g), 2014-10-03
Supplement: c4tx00092g1.pdf [file c4tx00092g1.pdf]

Table S1. Oligonucleotide primers and PCR conditions of rat in quantitative real-time PCR

| Genes         | Forward primer          | Reverse primer          | Product (bp) | Annealing |
|---------------|-------------------------|-------------------------|--------------|-----------|
| IGF1          | TCAGTTCGTGTGTGGACCAG    | TCACAGCTCCGGAAGCAAC     | 117          | 60        |
| IGF1R         | GTCCTTCGGGATGGTCTA      | TGGCCTTGGGATACTACAC     | 195          | 62        |
| IRS2          | GCAGTTCAGGTCGCCTCTGC    | GGAGCCACACCACATTCGCA    | 416          | 63        |
| GLUT2         | GACATCGGTGTGATCAATGC    | TGTCGTATGTGCTGGTGTGA    | 150          | 63        |
| G6Pase        | GTTTGGTTTCGCACTTGG      | CGGAATGGGAGCGACTT       | 237          | 59        |
| SREBP1c       | GCCATCGACTACATCCGCTTGTT | TGGGCTTTCACCTGGTTATCCTC | 311          | 64        |
| FoxO1         | ATGGCTATGGTAGGATGGGT    | CTAAAAGGAGGGGTGAAGGG    | 310          | 64        |
| FASN          | GTGAGTGTACGGGAGGGCTA    | GGCTCCACTGACTCTTCAC     | 266          | 67        |
| ACC $\alpha$  | CCATATGAACAGTCTTCAGGA   | GGAGCCAATCCGATATGTAA    | 133          | 63        |
| AMPK $\alpha$ | TACCGAGCTATGAAGCAGCTG   | GCTCATTTTCACGTAATTGCC   | 105          | 60        |
| CPT1a         | ATCGCAAAGATCAGTCGGAC    | AGCAGCACCTTCAGCGAGTA    | 140          | 64        |
| MTTP          | ATGCAAAATTGAGAGGTCCG    | TTGCTTCCCAGGTACCATTC    | 238          | 63        |
| GAPDH         | GACAACCTTGGCATCGTGGA    | ATGCAGGGATGATGTTCTGG    | 133          | 60        |

IGF1: insulin-like growth factor 1; IGF1R: insulin-like growth factor 1 receptor; IRS2: insulin receptor substrate 2; GLUT2: glucose transporter 2; G6Pase: glucose-6-phosphatase; SREBP1: sterol regulatory element binding protein 1; FoxO1: fork-head box transcription factor O1; FASN: fatty acid synthase; ACC $\alpha$ : acetyl-CoA carboxylase  $\alpha$ ; AMPK $\alpha$ : AMP-activated protein kinase  $\alpha$ ; CPT1 $\alpha$ : carnitine palmitoyltransferase 1 $\alpha$ ; MTTP: microsomal triglyceride transfer protein; GAPDH: glyceraldehyde-phosphate dehydrogenase.

Table S2. Oligonucleotide primers of rat in multiplex gene expression analysis.

| Gene   | Forward primer                               | Reverse primer                                | Product Size |
|--------|----------------------------------------------|-----------------------------------------------|--------------|
| IGF1   | AGGTGACACTATAGAATAAGCCTGC<br>GCAATCGAAATAA   | GTACGACTCACTATAGGGACACGAAC<br>TGAAGAGCGTCCA   | 366          |
| IGFBP3 | AGGTGACACTATAGAATAAGAGCAC<br>AGACACCCAGAACTT | GTACGACTCACTATAGGGAGCGTATTT<br>GAGCTCCACGTAA  | 374          |
| IGF1R  | AGGTGACACTATAGAATACAAGAC<br>AGAAGTCTGCGGTG   | GTACGACTCACTATAGGGACCGGGTC<br>TGIGATATGTAGG   | 282          |
| INSR   | AGGTGACACTATAGAATAACAGTGA<br>GCTGTTCGAGTTGG  | GTACGACTCACTATAGGGAATGAAGA<br>CTCCTCCAGCTCCTT | 226          |
| IRS1   | AGGTGACACTATAGAATAGGACCGT<br>CAATAGCTTAACTGG | GTACGACTCACTATAGGGAGTCACAGT<br>GCTTCTTGTGCT   | 289          |
| IRS2   | AGGTGACACTATAGAATATGTCCCA<br>TCACTTGAAAGAAG  | GTACGACTCACTATAGGGACCTGCCTC<br>TTGGTTCCTTATC  | 240          |

|               |                                              |                                               |     |
|---------------|----------------------------------------------|-----------------------------------------------|-----|
| GSK3 $\beta$  | AGGTGACACTATAGAATATTCAAAT<br>TCCCCAAATCAA    | GTACGACTCACTATAGGGATGACATTT<br>GGGTCCCCTAAT   | 212 |
| G6Pase        | AGGTGACACTATAGAATAATGGGCA<br>CAGCAGGTGTATA   | GTACGACTCACTATAGGGACAGGTAA<br>AATCCAAGTGCGAA  | 389 |
| SREBF1        | AGGTGACACTATAGAATACCATCGA<br>CTACATCCGCTTC   | GTACGACTCACTATAGGGAGTTATCCT<br>CAAAGGCTGGGC   | 333 |
| FoxO1         | AGGTGACACTATAGAATACAGCTGC<br>AATGGCTATGGTAG  | GTACGACTCACTATAGGGACAGTTCCC<br>GGTGTGAGACAAT  | 317 |
| PPAR $\alpha$ | AGGTGACACTATAGAATACACTGAA<br>CATCGAGTGTGCGAA | GTACGACTCACTATAGGGAAGCTTTAG<br>CCGAATAGTTCGC  | 149 |
| HNF4          | AGGTGACACTATAGAATATACCCTC<br>CATTAAATGCGCTC  | GTACGACTCACTATAGGGAACACACAT<br>CCGTGATGTTGG   | 156 |
| FASN          | AGGTGACACTATAGAATAGTGAGTG<br>TACGGGAGGGCTA   | GTACGACTCACTATAGGGAGGCCTCCA<br>CTGACTCTTCAC   | 340 |
| ACC $\alpha$  | AGGTGACACTATAGAATACCATATG<br>AACAGACTTCCAGGA | GTACGACTCACTATAGGGAGGAGCCA<br>ATCCGATATGTAA   | 170 |
| CPT1 $\alpha$ | AGGTGACACTATAGAATAATCGCAA<br>AGATCAGTCGGAC   | GTACGACTCACTATAGGGAAGCAGCA<br>CCTTCAGCGAGTA   | 177 |
| AMPK $\alpha$ | AGGTGACACTATAGAATATACCGAG<br>CTATGAAGCAGCTG  | GTACGACTCACTATAGGGAGCTCATTT<br>TCACGTAATTGCC  | 142 |
| MTP           | AGGTGACACTATAGAATAATGCAAA<br>ATTGAGAGGTCCG   | GTACGACTCACTATAGGGATTGCTTCC<br>CAGGTACCATTG   | 275 |
| APOB          | AGGTGACACTATAGAATAATGGTGC<br>ATGAGTATGCCAA   | GTACGACTCACTATAGGGAATCCCACT<br>TTTGGGAGGTTC   | 233 |
| HMGCR         | AGGTGACACTATAGAATAAGGTGAA<br>GAGCTGGCTTGAA   | GTACGACTCACTATAGGGAGGATGTA<br>GAGGTTGCGTCT    | 163 |
| AdipoR2       | AGGTGACACTATAGAATAAACCAC<br>AACCTTGCTTCAT    | GTACGACTCACTATAGGGAAGAGGGC<br>AGTCCCTGTGATA   | 296 |
| LepR          | AGGTGACACTATAGAATACCTGGCC<br>TATCCAACCTCT    | GTACGACTCACTATAGGGACAGCGTCT<br>TCCCTTCAGTGT   | 304 |
| JAK2          | AGGTGACACTATAGAATACCCACCT<br>GTGGAATTTATGC   | GTACGACTCACTATAGGGACATTGTTG<br>TTCCAGCATICTG  | 198 |
| mTOR2         | AGGTGACACTATAGAATAGAGGAAC<br>GTCAAAGGCATGT   | GTACGACTCACTATAGGGATTTCATGTA<br>CTTTCGGCACCA  | 184 |
| GAPDH         | AGGTGACACTATAGAATATCTCTGCT<br>CCTCCCTGTTCTAG | GTACGACTCACTATAGGGAGGICAATG<br>AAGGGTTCGTTG   | 219 |
| ACTB          | AGGTGACACTATAGAATAGTCCACC<br>CGCGAGTACAAC    | GTACGACTCACTATAGGGACCCACGTA<br>GGAGTCTTCTG    | 268 |
| HPRT1         | AGGTGACACTATAGAATAGCTTTCCT<br>TGGTCAAGCAGT   | GTACGACTCACTATAGGGATCTTTACT<br>GGCCACATCAACAG | 310 |

IGF1: insulin-like growth factor 1; IGFBP3: insulin-like growth factor binding protein 3; IGF1R: insulin-like growth factor 1 receptor; INSR: insulin receptor; IRS1: insulin receptor substrate 1; IRS2: insulin receptor substrate 2; GSK3 $\beta$ : glycogen synthase kinase 3 $\beta$ ; G6Pase: glucose-6-phosphatase; SREBF1: sterol regulatory

element binding protein 1; FoxO1: fork-head box transcription factor O1; PPAR $\alpha$ : peroxisome proliferator-activated receptor  $\alpha$ ; HNF4: Hepatocyte nuclear factor 4; FASN: fatty acid synthase; ACC $\alpha$ : acetyl-CoA carboxylase  $\alpha$ ; CPT1 $\alpha$ : carnitinepalmitoyl acyl-CoA transferase 1 $\alpha$ ; AMPK $\alpha$ : adenosine monophosphate activated protein kinase  $\alpha$ ; MTTP: microsomal triglyceride transfer protein; APOB: apolipoprotein B; HMGCR: HMG-CoA reductase; AdipoR2: adiponectin receptor 2; LepR: leptin receptor; JAK2: Janus Kinase 2; mTOR2: mammalian target of rapamycin complex 2; GAPDH: glyceraldehyde-phosphate dehydrogenase; ACTB:  $\beta$  actin; HPRT1: hypoxanthine phosphoribosyltransferase.

Table S3. Hypotheses testing result for Fig. 1

| Parameters   | Normal diet        |             |                 | High-fat diet      |             |                 |
|--------------|--------------------|-------------|-----------------|--------------------|-------------|-----------------|
|              | Degrees of freedom | t-statistic | <i>P</i> -value | Degrees of freedom | t-statistic | <i>P</i> -value |
| Glucose      | 14                 | 0.2202      | <i>P</i> >0.05  | 14                 | 2.322       | <i>P</i> <0.05  |
| Triglyceride | 14                 | 0.7352      | <i>P</i> >0.05  | 14                 | 5.350       | <i>P</i> <0.01  |

Table S4. Hypotheses testing result for Fig. 3

| Parameters    | Normal diet        |             |                 | High-fat diet      |             |                 |
|---------------|--------------------|-------------|-----------------|--------------------|-------------|-----------------|
|               | Degrees of freedom | t-statistic | <i>P</i> -value | Degrees of freedom | t-statistic | <i>P</i> -value |
| IGF1          | 14                 | 0.3956      | <i>P</i> >0.05  | 14                 | 4.155       | <i>P</i> <0.01  |
| IGF1R         | 14                 | 0.6929      | <i>P</i> >0.05  | 14                 | 5.221       | <i>P</i> <0.01  |
| IRS2          | 14                 | 0.0748      | <i>P</i> >0.05  | 14                 | 2.136       | <i>P</i> <0.05  |
| GLUT2         | 14                 | 5.295       | <i>P</i> <0.01  | 14                 | 2.451       | <i>P</i> <0.05  |
| G6Pase        | 14                 | 4.352       | <i>P</i> <0.01  | 14                 | 2.532       | <i>P</i> <0.05  |
| SREBP1c       | 14                 | 0.3214      | <i>P</i> >0.05  | 14                 | 5.341       | <i>P</i> <0.01  |
| FoxO1         | 14                 | 0.6423      | <i>P</i> >0.05  | 14                 | 4.632       | <i>P</i> <0.01  |
| FASN          | 14                 | 5.228       | <i>P</i> <0.01  | 14                 | 2.432       | <i>P</i> <0.05  |
| ACC $\alpha$  | 14                 | 0.2234      | <i>P</i> >0.05  | 14                 | 2.762       | <i>P</i> <0.05  |
| AMPK $\alpha$ | 14                 | 0.3278      | <i>P</i> >0.05  | 14                 | 2.543       | <i>P</i> <0.05  |
| CPT1 $\alpha$ | 14                 | 2.856       | <i>P</i> <0.05  | 14                 | 2.763       | <i>P</i> <0.05  |
| MTTP          | 14                 | 2.771       | <i>P</i> <0.05  | 14                 | 2.891       | <i>P</i> <0.05  |

Table S5. Hypotheses testing result for Fig. 4

| Parameters   | Degrees of freedom | t-statistic | <i>P</i> -value |
|--------------|--------------------|-------------|-----------------|
| Glucose      | 14                 | 5.4302      | <i>P</i> <0.01  |
| Triglyceride | 14                 | 5.7652      | <i>P</i> <0.01  |

Table S6. Hypotheses testing result for Fig. 6

| Parameters | Degrees of freedom | t-statistic | <i>P</i> -value |
|------------|--------------------|-------------|-----------------|
| IGF1       | 14                 | 4.345       | <i>P</i> <0.01  |

|         |    |       |                |
|---------|----|-------|----------------|
| IGFBP3  | 14 | 0.211 | <i>P</i> >0.05 |
| IGF1R   | 14 | 2.133 | <i>P</i> <0.05 |
| INSR    | 14 | 5.432 | <i>P</i> <0.01 |
| IRS1    | 14 | 0.332 | <i>P</i> >0.05 |
| IRS2    | 14 | 0.324 | <i>P</i> >0.05 |
| GSK3b   | 14 | 0.432 | <i>P</i> >0.05 |
| G6Pase  | 14 | 2.447 | <i>P</i> <0.05 |
| SREBP1c | 14 | 2.892 | <i>P</i> <0.05 |
| FoxO1   | 14 | 2.557 | <i>P</i> <0.05 |
| PPARa   | 14 | 0.471 | <i>P</i> >0.05 |
| HNF4    | 14 | 0.248 | <i>P</i> >0.05 |
| FASN    | 14 | 2.562 | <i>P</i> <0.05 |
| ACCa    | 14 | 2.991 | <i>P</i> <0.05 |
| CPT1    | 14 | 2.341 | <i>P</i> <0.05 |
| AMPKa   | 14 | 2.783 | <i>P</i> <0.05 |
| MTTP    | 14 | 2.419 | <i>P</i> <0.05 |
| APOB    | 14 | 0.342 | <i>P</i> >0.05 |
| HMGCR   | 14 | 0.263 | <i>P</i> >0.05 |
| AdipoR2 | 14 | 0.274 | <i>P</i> >0.05 |
| LepR    | 14 | 0.382 | <i>P</i> >0.05 |
| JAK2    | 14 | 0.263 | <i>P</i> >0.05 |
| mTOR2   | 14 | 0.316 | <i>P</i> >0.05 |

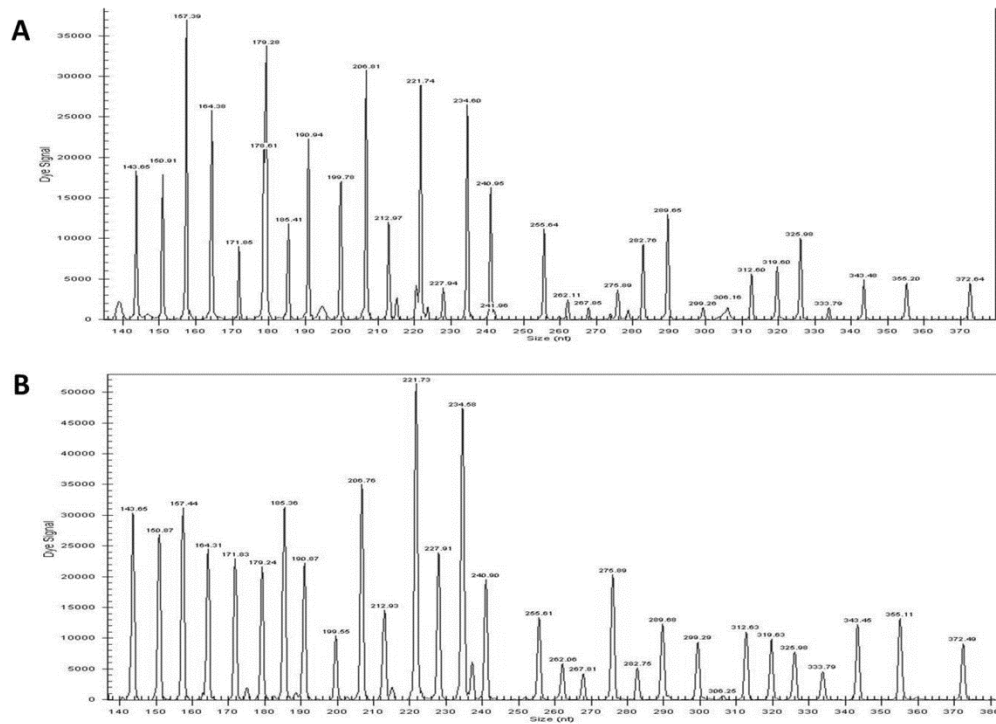

**Fig. S1. Typical spectra of fetal liver multiplex gene expression.**

A: control group; B: nicotine group

## **Supplementary information legends**

**Supplementary information Table S1** Oligonucleotide primers and PCR conditions of rat in quantitative real-time PCR.

**Supplementary information Table S2** Oligonucleotide primers of rat in multiplex gene expression analysis.

**Supplementary information Table S3** Hypotheses testing result for Fig. 1

**Supplementary information Table S4** Hypotheses testing result for Fig. 3

**Supplementary information Table S5** Hypotheses testing result for Fig. 4

**Supplementary information Table S6** Hypotheses testing result for Fig. 6

**Supplementary information Fig. S1** Typical spectra of fetal liver multiplex gene expression. A: control group; B: nicotine group.
